# Supplementary material
Source: PubMed Central journal article supplement (PMC7825924)

# Figure 1

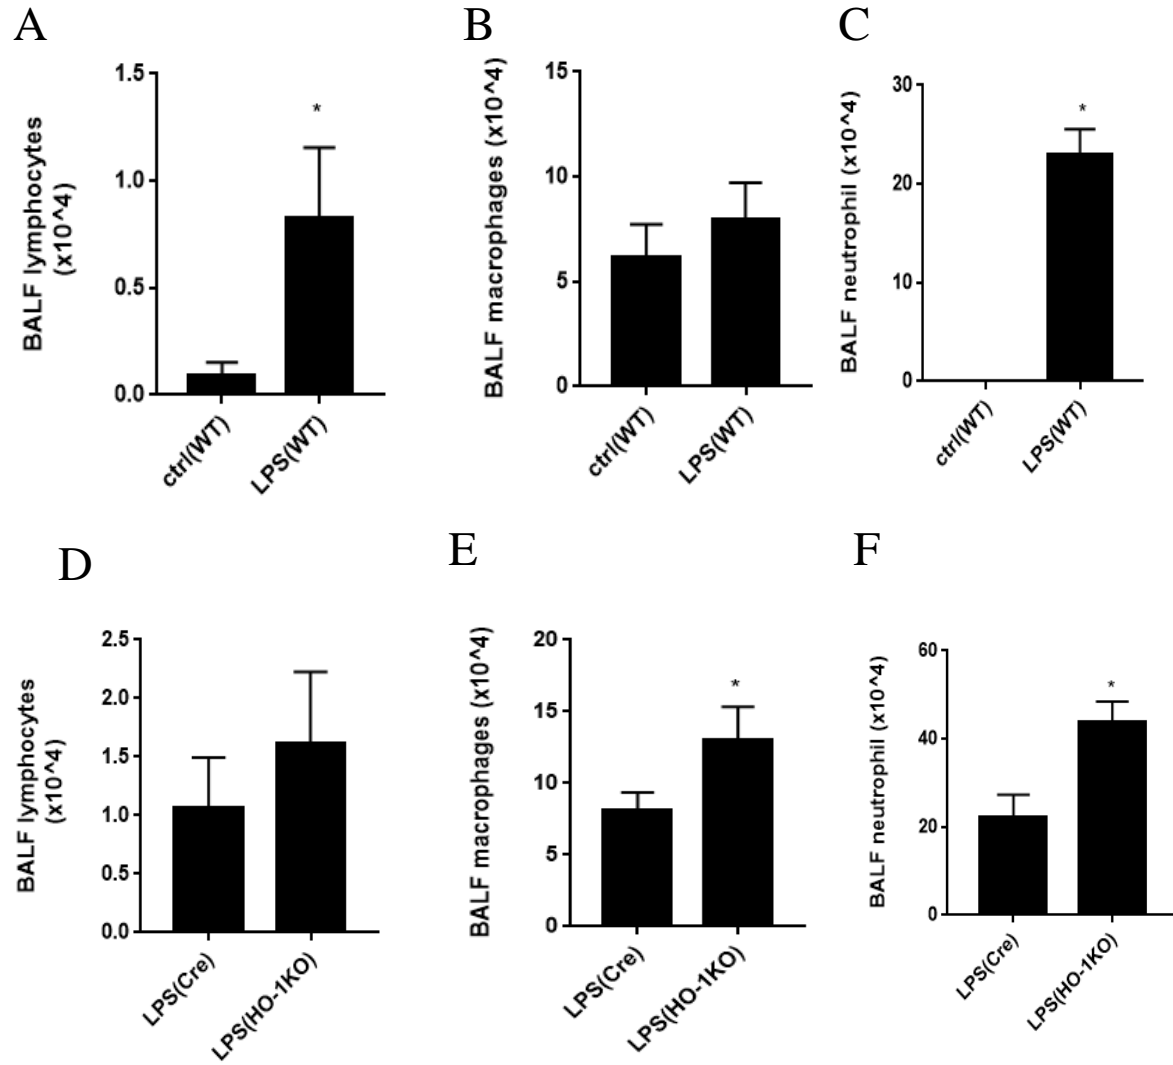

Supplement: mmc1.pdf [file mmc1.pdf]
